# Supplementary material for: Reducing Defects in Organic-Lead Halide Perovskite Film by Delayed Thermal Annealing Combined with KI/I2 for Efficient Perovskite Solar Cells
Source: MDPI journal article supplement (doi:10.3390/nano11061607), 2021-06-18
Supplement: s1 [file s1]

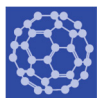

Supplementary information

# Reducing Defects in Organic-Lead Halide Perovskite Film by Delayed Thermal Annealing Combined with KI/I<sub>2</sub> for Efficient Perovskite Solar Cells

Kun-Mu Lee <sup>1,2,3,4,\*</sup>, Shun-Hsiang Chan <sup>1,3</sup>, Wei-Hao Chiu <sup>3</sup>, Seoungjun Ahn <sup>1</sup>, Chang-Chieh Ting <sup>1</sup>, Yin-Hsuan Chang <sup>1</sup>, Vembu Suryanarayanan <sup>5</sup>, Ming-Chung Wu <sup>1,2,3,\*</sup> and Ching-Yuan Liu <sup>6,\*</sup>

<sup>1</sup> Department of Chemical and Materials Engineering, Chang Gung University, Taoyuan 33302, Taiwan; shunhsiangchan@gmail.com (S.-H.C.); jun864@naver.com (S.A.); kero5206@gmail.com (C.-C.T.); cgu.yinhsuanchang@gmail.com (Y.-H.C.)

<sup>2</sup> Division of Neonatology, Department of Pediatrics, Chang Gung Memorial Hospital, Linkou, Taoyuan 33305, Taiwan

<sup>3</sup> Green Technology Research Center, Chang Gung University, Taoyuan 33302, Taiwan; weihua.chiu@gmail.com

<sup>4</sup> Center for Reliability Sciences and Technologies, Chang Gung University, Taoyuan 33302, Taiwan

<sup>5</sup> Electroorganic and Materials Electrochemistry Division, CSIR-Central Electrochemical Research Institute, Karaikudi 630003, India; vidhyasur@yahoo.co.in

<sup>6</sup> Department of Chemical and Materials Engineering, National Central University, Jhongli District, Taoyuan 32001, Taiwan

\* Correspondence: kmlee@mail.cgu.edu.tw (K.-M.L.); mingchungwu@cgu.edu.tw (M.-C.W.); cyliu0312@ncu.edu.tw (C.-Y.L.)

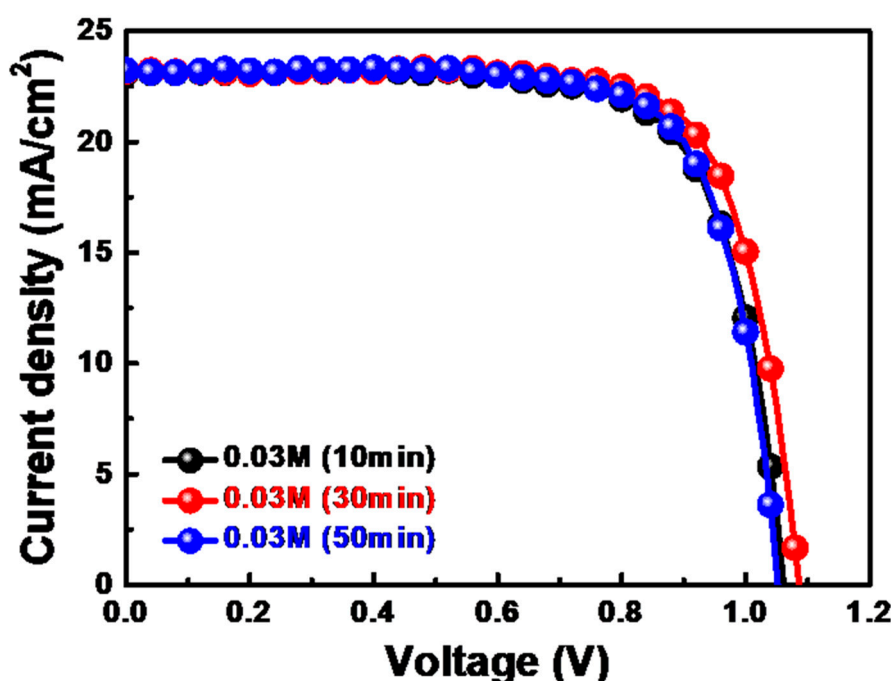

Figure S1. The J-V curves of PSCs with 30 mM KI under various thermal baking time.

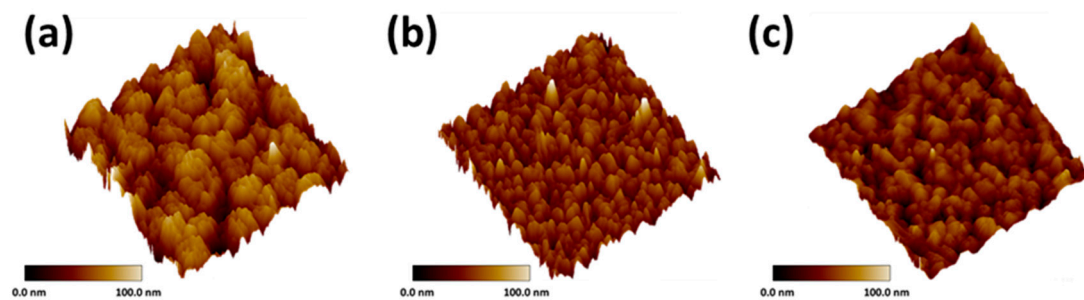

**Figure S2.** The AFM images of perovskite film with 30 mM KI at different delay-annealing times. (a) 0 min, (b) 30 min and (c) 60 min.

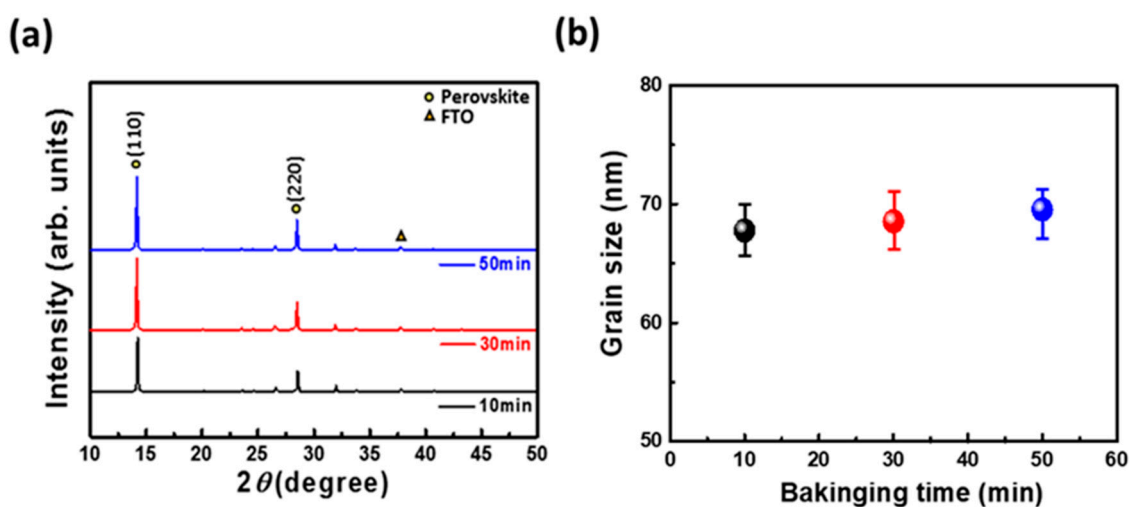

**Figure S3.** (a) XRD analysis of perovskite films with 0.03M KI under various thermal baking times. (b) Crystal size in perovskite films with 0.03M KI under various thermal baking times.

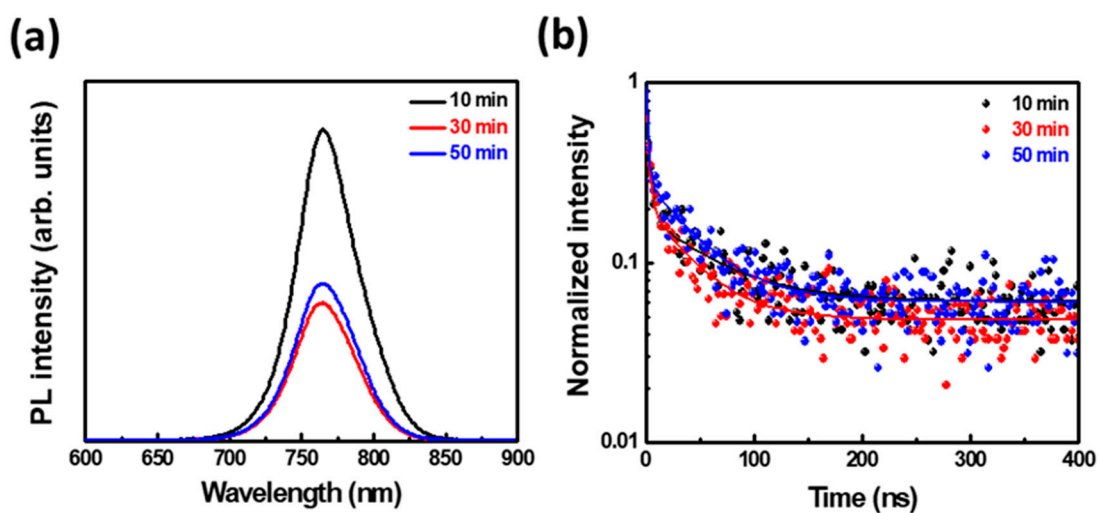

**Figure S4.** (a) PL and (b) TRPL of perovskite films with 0.03M KI on TiO<sub>2</sub>/FTO glass under various thermal baking times.

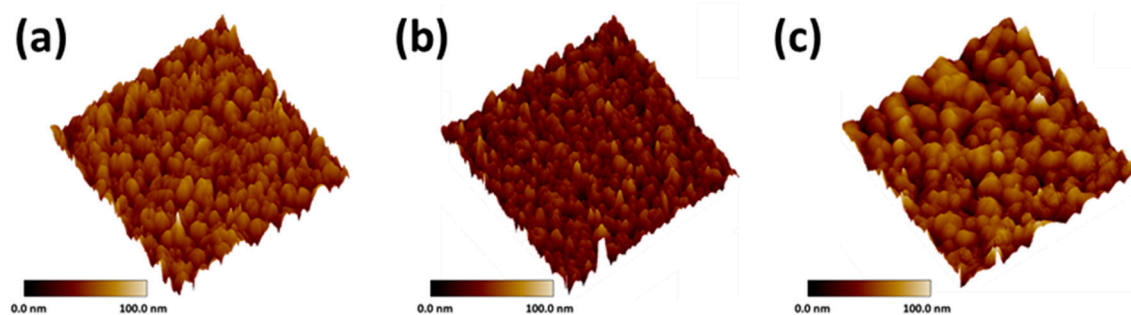

**Figure S5.** AFM of perovskite films with 0.03M KI/I<sub>2</sub> on TiO<sub>2</sub>/FTO glass at different delayed annealing times. (a) 10 min, (b) 30 min and (c) 60 min.

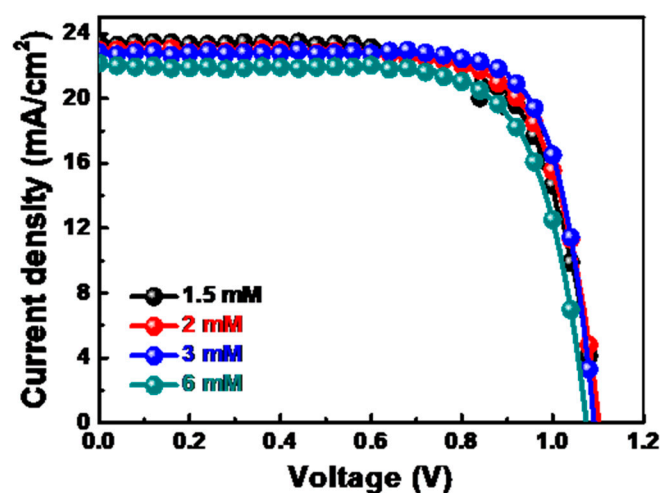

**Figure S6.** The J-V curves of PSCs with 30 mM KI and various concentrations of I<sub>2</sub>.

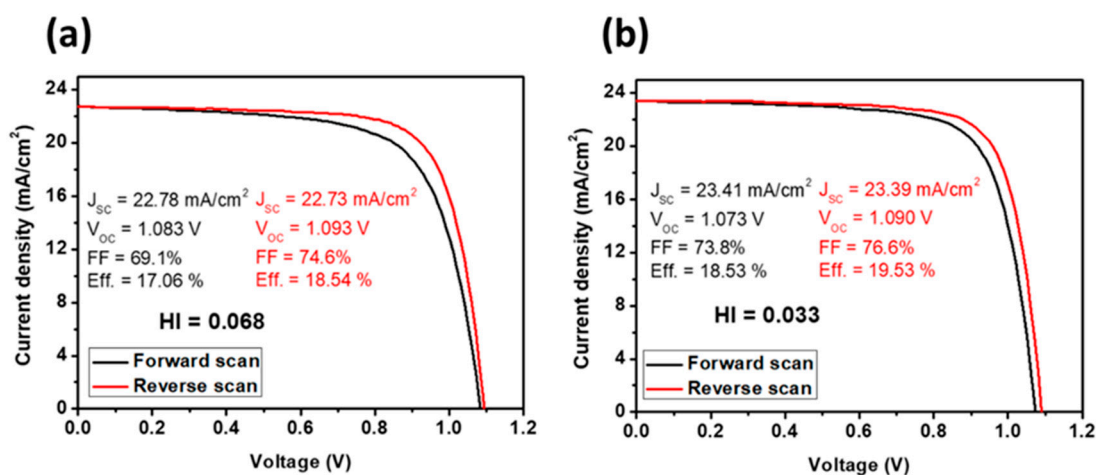

**Figure S7.** The J-V curves of PSCs by forward (Black) and reverse scan (Red). (a) Pristine and (b) KI (30 mM) + I<sub>2</sub> (3 mM).

**Table S1.** The  $R_{\text{max}}$  and RMS of perovskite films with 30 mM KI prepared at different delayed annealing times.

| Time (min)            | 0   | 30  | 60  |
|-----------------------|-----|-----|-----|
| $R_{\text{max}}$ (nm) | 482 | 429 | 154 |
| RMS (nm)              | 53  | 36  | 19  |

**Table S2.** Photovoltaic characteristics of PSCs with 30 mM KI at different thermal baking times.

| Time (min) |                | $V_{\text{oc}}$ (V) | $J_{\text{sc}}$ (mA/cm <sup>2</sup> ) | FF (%)     | PCE (%)      |
|------------|----------------|---------------------|---------------------------------------|------------|--------------|
| 10         | Maximum        | 1.061               | 23.09                                 | 73.8       | 18.10        |
|            | Mean deviation | 1.060 ± 0.014       | 22.65 ± 0.41                          | 71.6 ± 1.4 | 17.22 ± 0.58 |
| 30         | Maximum        | 1.086               | 23.19                                 | 75.1       | 18.93        |
|            | Mean deviation | 1.069 ± 0.014       | 22.73 ± 0.30                          | 75.5 ± 1.9 | 18.21 ± 0.39 |
| 50         | Maximum        | 1.052               | 23.22                                 | 74.7       | 18.26        |
|            | Mean deviation | 1.061 ± 0.010       | 22.88 ± 0.29                          | 73.2 ± 1.4 | 17.77 ± 0.42 |

**Table S3.** The carrier lifetimes of perovskite with 30 mM KI fitting from TRPL analysis at different thermal baking times.

| Thermal Baking Time (min) | $A_1$ (%) | $\tau_1$ (ns) | $A_2$ (%) | $\tau_2$ (ns) | $\tau_{\text{avg}}$ (ns) |
|---------------------------|-----------|---------------|-----------|---------------|--------------------------|
| 10                        | 86        | 2.7           | 14        | 58.7          | 10.5                     |
| 30                        | 79        | 2.3           | 21        | 39.8          | 10.2                     |
| 50                        | 73        | 1.9           | 27        | 44.1          | 13.3                     |

**Table S4.**  $R_{\text{max}}$  and RMS of perovskite films with KI (30 mM)/I<sub>2</sub> (3 mM) at various delayed thermal annealing times.

| Time (min)            | 0   | 30  | 60  |
|-----------------------|-----|-----|-----|
| $R_{\text{max}}$ (nm) | 366 | 366 | 225 |
| RMS (nm)              | 34  | 28  | 26  |
